# Supplementary material for: A Data‐Driven and Biologically Inspired Preprocessing Scheme to Improve Visual Object Recognition
Source: Hindawi journal article supplement (doi:10.1155/2021/6699335), 2021-01-01
Supplement: f1 [file 6699335.f1.docx]

The three public datasets used to support this study are available at:

<https://mmcheng.net/msra10k/>

<http://www.cse.cuhk.edu.hk/~leojia/projects/hsaliency/dataset.html>

<http://www.vision.caltech.edu/Image_Datasets/Caltech101/>
